# Supplementary material
Source: publisher figshare collection journal article supplement (https://sage.figshare.com/ndownloader/files/17855420)
Supplement: Supplementary file 1 [file 17855420]

Reviewer 1 v.1

Comments to the Author

Nice research exploring potential predictors of diastolic dysfunction in OSA patients.

Main limitation is related to sample size.

In result section, several polysomnographic measures showed statistically tendency that authors should include as study limitations/ future research in this field.

Finally, It would be grateful if authors can evaluated the risk of severe hypoxemia during PSG using a cut off of TST-90 >20% and nadir SaO<sub>2</sub> < 75% in univariate analysis. these parameters should be linked to poor diagnosis in moderate/severe OSAS (Sleep Breath. 2019 May 12. doi: 10.1007/s11325-019-01860-0.)
